# Supplementary material for: Combined Interval Cytoreductive Surgery and Carboplatin-Based Hyperthermic Intraperitoneal Chemotherapy in Advanced Primary High-Grade Serous Ovarian Cancer
Source: MDPI journal article supplement (doi:10.3390/curroncol30120748), 2023-12-01
Supplement: s1 [file s1]

---

**Supplementary Table S1.** Description of severe adverse events

---

|           |                                                                                                                                                             |
|-----------|-------------------------------------------------------------------------------------------------------------------------------------------------------------|
| Patient 1 | Readmission to ICU 30 days post-op for hypovolemia and acute kidney injury                                                                                  |
| Patient 2 | Extubation failure due to glottis edema causing asystole secondary to respiratory insufficiency and requiring ICU admission (length of surgery 510 minutes) |
| Patient 3 | Septic shock requiring ICU admission                                                                                                                        |
| Patient 4 | Septic shock required ICU admission                                                                                                                         |
| Patient 5 | Opioid overdose requiring ICU admission                                                                                                                     |
| Patient 6 | Readmission for drainage of hepatic abscess                                                                                                                 |
| Patient 7 | Readmission for small bowel obstruction requiring surgery for adhesion lysis                                                                                |
| Patient 8 | Readmission for bacterial peritonitis requiring ascites drainage                                                                                            |

---
